# Supplementary material for: Giving a Voice to Patients With Smell Disorders Associated With COVID-19: Cross-Sectional Longitudinal Analysis Using Natural Language Processing of Self-Reports
Source: PubMed Central journal article supplement (PMC11127136; doi:10.2196/47064), 2024-05-10
Supplement: publichealth_v10i1e47064_app1.pdf [file publichealth_v10i1e47064_app1.pdf]

**Coding scheme S1. Guidelines that were used in aim 1 to code the comments regarding their olfactory dysfunction.**

- Every 'smell change' comment is coded by means of dummy coding in 5 smell change categories, each in one column:
  1. Parosmia (0: no; 1: yes)
  2. Phantosmia (0: no; 1: yes)
  3. Anosmia (0: no; 1: yes)
  4. Hyposmia (0: no; 1: yes)
  5. Hyperosmia (0: no; 1: yes)
  6. Recovered (0: no; 1: partial; 2: fully)
- Comments are also coded for mentioning of specific objects:
  7. Food and beverages (0: not mentioned; 1: present in comment)
  8. Non-food items (0: not mentioned; 1: present in comment)
- Coding in the present: at time of filling in the survey (i.e., ignore reports of previous changes in smell)
  1. Parosmia
    - Mentioning that *something* (a source) smells different than before, generally worse than before, 'it is like...'. Also: 'everything smells like [...]'
  2. Phantosmia
    - Smelling something when a source is not present, smelling something that is not there, 'it smells like [...] (all the time)'.
  3. Anosmia
    - 'I can't smell anything.' 'No smell at all'
  4. Hyposmia
    - Smell is back to some extent (relative to before). 'I can smell to some (lesser) extent'. 'I can smell but smells/odors are faint', or 'smell comes and goes' (morning/evening). 'I can only smell [very specific real present object smell]'
  5. Hyperosmia
    - Smell ability is better than before.
  6. Recovered
    - Smell is back (2: yes). Smell is back to some degree/any recovery of smell (1: partial).
  7. Some categories are mutually exclusive:

- Parosmia -> no anosmia
  - Anosmia -> no hyposmia, recovery is always 0, Anosmia -> No parosmia
  - Hyposmia -> no anosmia
8. No coding of item-specific anosmia (e.g. “I cannot perceive the smell of flowers and of sage”). These items should be commented as unsure, and can be discussed later.

### **Practical implementation of the coding scheme**

Coders were first trained on the coding scheme by developing a set of rules, and a small subset of comments were coded followed by a discussion of comments that were difficult to code. Data was divided into eight roughly equal groups of around 350 comments. Groups were formed based on a semi-random number generator (draw 2542 times a number 1-8). A small set of comments (n=40), was coded by every coder to allow calculation of inter-coder agreement. Agreement between coders was calculated by means of Fleiss's kappa. Agreement between the eight coders was deemed acceptable, for anosmia ( $\kappa=0.77$ ), parosmia ( $\kappa=0.78$ ), phantosmia ( $\kappa=0.58$ ), hyposmia ( $\kappa=0.69$ ), presence of food items ( $\kappa=0.80$ ), and non-food items ( $\kappa=0.74$ ). No agreement was reached on whether people recovered fully, partially or not at all ( $\kappa=0.13$ ). Coders marked cases of which they were uncertain, and these were discussed during a group meeting. This discussion led to the inclusion of an additional variable, “hyperosmia”, or an *increased* sensitivity in the sense of smell. However, due to its low prevalence (n=13) none of the analyses included this variable. There were 169 cases that were unresolved, and these were again re-coded by two previous coders and two new coders. Unresolved comments from the two previous coders were exclusively analysed by the two new coders.
