# Supplementary material for: Giving a Voice to Patients With Smell Disorders Associated With COVID-19: Cross-Sectional Longitudinal Analysis Using Natural Language Processing of Self-Reports
Source: PubMed Central journal article supplement (PMC11127136; doi:10.2196/47064), 2024-05-10

**Figure S6. Odds ratios from the logistic regressions examining the association between smell long-hauling and prevalence of olfactory disorders.** Long-hauler status: smell long- versus non-long-hauler (reference category), Gender: men versus women (reference category), Translation: yes versus no (reference category).

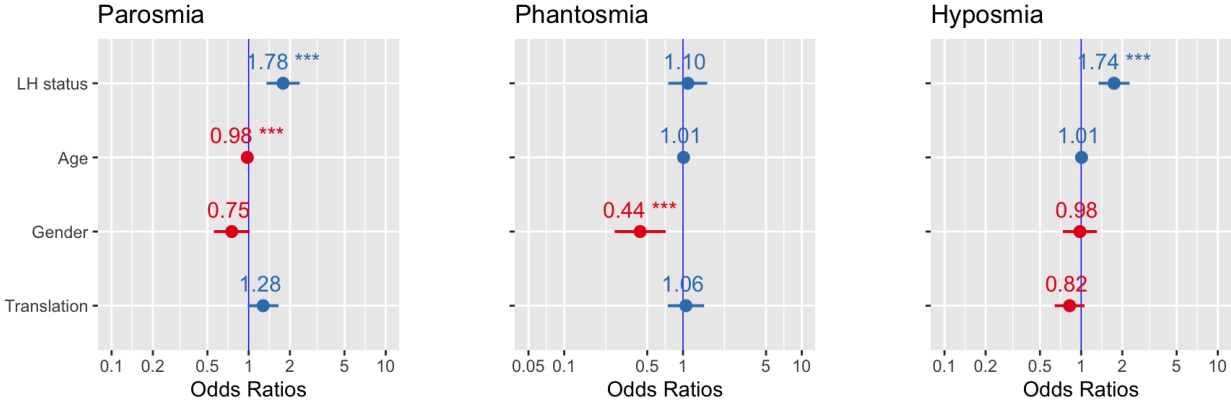

Supplement: publichealth_v10i1e47064_app6.pdf [file publichealth_v10i1e47064_app6.pdf]
