# Supplementary material for: Giving a Voice to Patients With Smell Disorders Associated With COVID-19: Cross-Sectional Longitudinal Analysis Using Natural Language Processing of Self-Reports
Source: PubMed Central journal article supplement (PMC11127136; doi:10.2196/47064), 2024-05-10
Supplement: publichealth_v10i1e47064_app8.pdf [file publichealth_v10i1e47064_app8.pdf]

**Table S8. Logistic regression investigating whether smell long- vs. non-longhauliers differed in terms of reported hyposmia they respectively experienced.** For each variable, the estimate ( $\beta$ ), the standard error of the mean (SE), the z statistic, and the p-value are given. The estimate of the variable *Longhauling status* is for the comparison between the longhauliers (reference category) and the non-longhauliers. The estimate of the variable *Gender* is for the comparison between men (reference category) and women. The estimate of the variable *Translation* is for the comparison between translated (reference category) or untranslated comments into English.

|                    | $\beta$ | SE    | z     | p       |
|--------------------|---------|-------|-------|---------|
| Intercept          | 0.05    | 0.14  | 0.36  |         |
| Longhauling status | 0.55    | 0.13  | 4.16  | <0.0001 |
| Age*               | 0.008   | 0.005 | 1.48  | 0.14    |
| Gender             | -0.02   | 0.15  | -0.14 | 0.89    |
| Translation        | -0.19   | 0.13  | -1.51 | 0.13    |

\* The variable *Age* was centered.
