# Supplementary material for: Giving a Voice to Patients With Smell Disorders Associated With COVID-19: Cross-Sectional Longitudinal Analysis Using Natural Language Processing of Self-Reports
Source: PubMed Central journal article supplement (PMC11127136; doi:10.2196/47064), 2024-05-10
Supplement: publichealth_v10i1e47064_app9.pdf [file publichealth_v10i1e47064_app9.pdf]

**Table S9. Logistic regression investigating whether smell long- vs. non-longhaulers differed in terms of reported phantosmia they respectively experienced.** For each variable, the estimate ( $\beta$ ), the standard error of the mean (SE), the z statistic, and the p-value are given. The estimate of the variable *Longhauling status* is for the comparison between the longhaulers (reference category) and the non-longhaulers. The estimate of the variable *Gender* is for the comparison between men (reference category) and women. The estimate of the variable *Translation* is for the comparison between translated (reference category) or untranslated comments into English.

|                    | $\beta$ | SE    | z      | p     |
|--------------------|---------|-------|--------|-------|
| Intercept          | -1.73   | 0.20  | -8.474 |       |
| Longhauling status | 0.09    | 0.19  | 0.49   | 0.63  |
| Age*               | 0.01    | 0.007 | 1.51   | 0.13  |
| Gender             | -0.83   | 0.25  | -3.29  | 0.001 |
| Translation        | 0.06    | 0.18  | 0.31   | 0.75  |

\* The variable *Age* was centered.
