# Supplementary material for: Giving a Voice to Patients With Smell Disorders Associated With COVID-19: Cross-Sectional Longitudinal Analysis Using Natural Language Processing of Self-Reports
Source: PubMed Central journal article supplement (PMC11127136; doi:10.2196/47064), 2024-05-10

**Figure S11. Proportion of non-long-haulers' comments and their sentiments, as classified by the model trained on restaurant reviews. The comments are smell-related self-reports from a web-based survey on COVID-19 that was administered globally between September 2020 and February 2021. 0: no dysfunction reported; 1: dysfunction reported.**

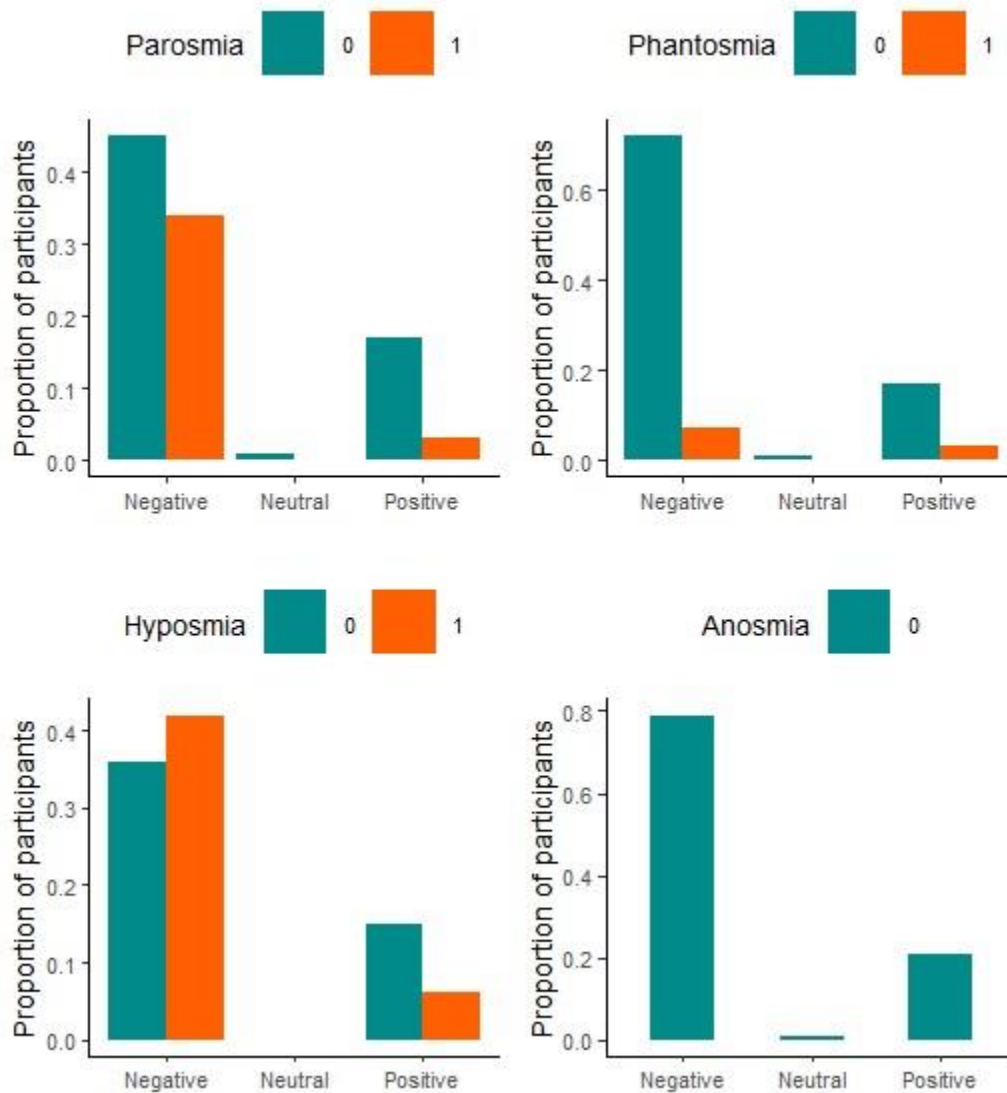

Supplement: publichealth_v10i1e47064_app11.pdf [file publichealth_v10i1e47064_app11.pdf]
