# Supplementary material for: Giving a Voice to Patients With Smell Disorders Associated With COVID-19: Cross-Sectional Longitudinal Analysis Using Natural Language Processing of Self-Reports
Source: PubMed Central journal article supplement (PMC11127136; doi:10.2196/47064), 2024-05-10

**Figure S12. Sentiment classification from the model that was trained on laptop reviews.** Showing the proportion of comments from long-haulers that were classified as negative, neutral, and positive across all smell disorders. 0: No dysfunction reported, 1: Dysfunction reported.

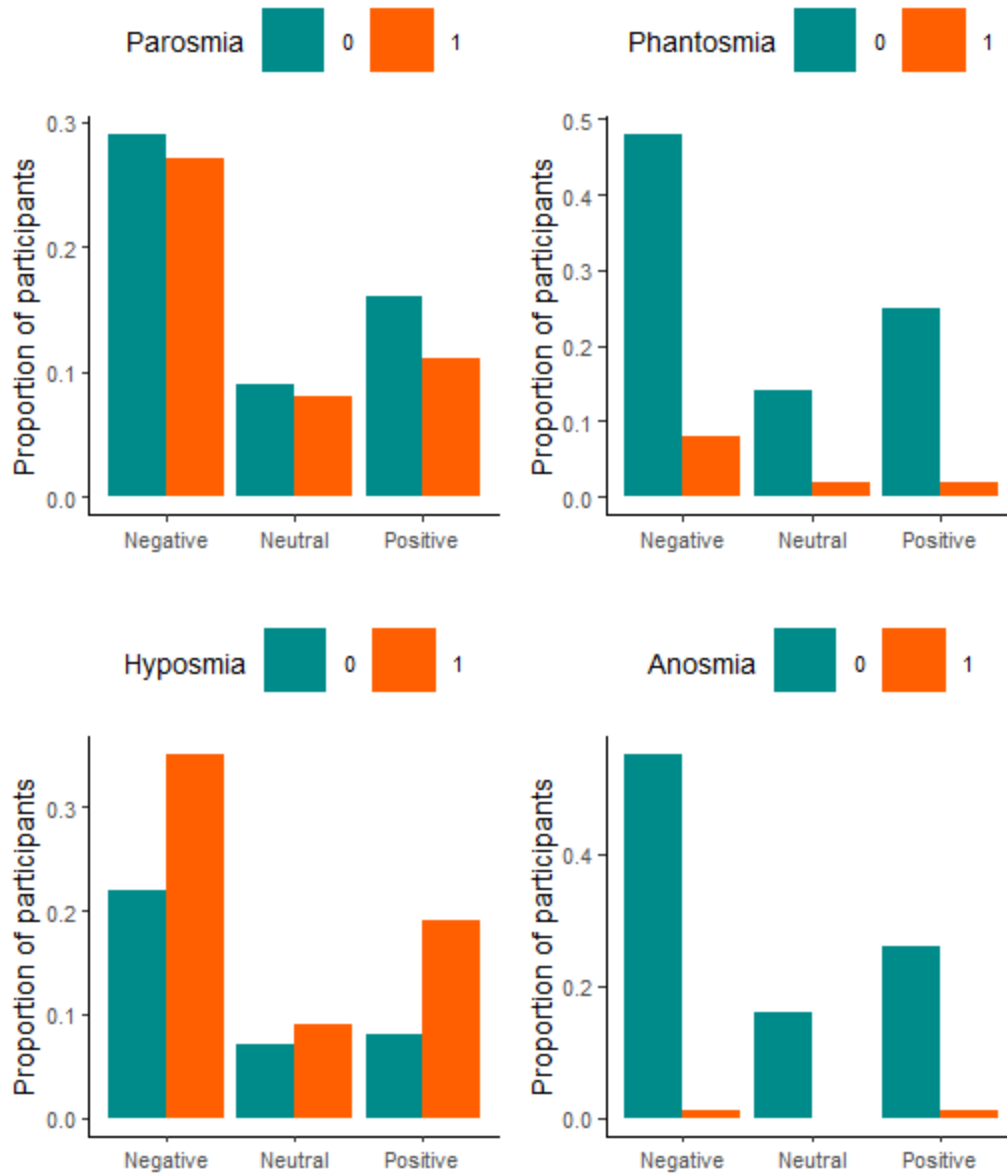

Supplement: publichealth_v10i1e47064_app12.pdf [file publichealth_v10i1e47064_app12.pdf]
