# Supplementary material for: Giving a Voice to Patients With Smell Disorders Associated With COVID-19: Cross-Sectional Longitudinal Analysis Using Natural Language Processing of Self-Reports
Source: PubMed Central journal article supplement (PMC11127136; doi:10.2196/47064), 2024-05-10

**Figure S14. Word clouds of words that were extracted from long-hauler and non-long-hauler comments, where the size of each word is determined by its frequency. The comments are smell-related self-reports from a web-based survey on COVID-19 that was administered globally from September to November in the fall of 2020.**

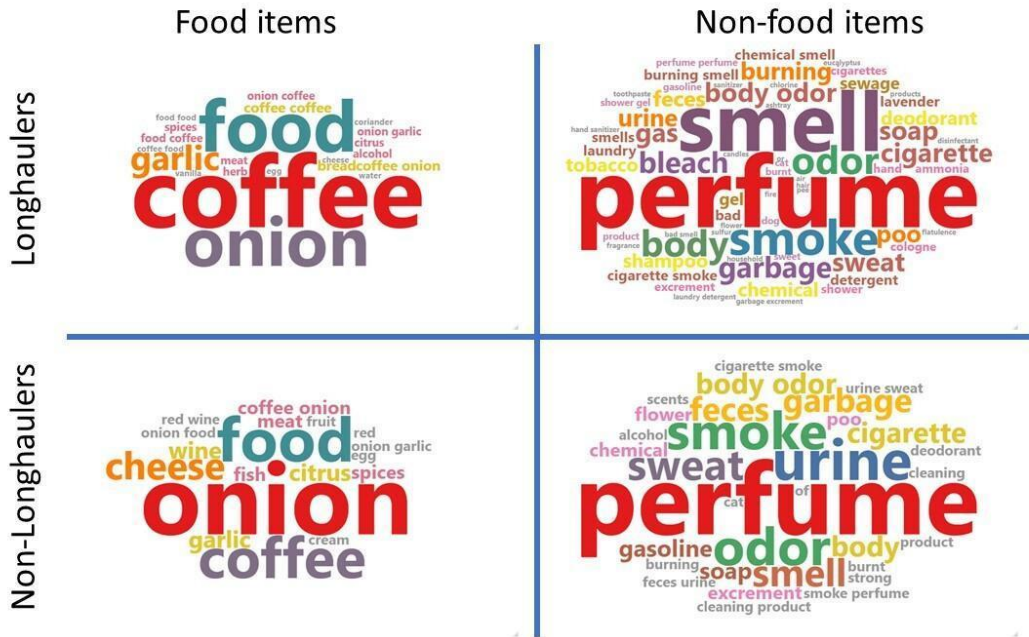

Supplement: publichealth_v10i1e47064_app14.pdf [file publichealth_v10i1e47064_app14.pdf]
